# Supplementary material
Source: PubMed Central journal article supplement (PMC2824257)
Supplement: NIHMS174124-supplement-suppl_figs.pdf [file NIHMS174124-supplement-suppl_figs.pdf]

## Supplementary Figures

T Cell Factor-1 initiates T helper 2 fate by inducing GATA-3 and repressing Interferon- $\gamma$

Qing Yu, Archana Sharma, Sun Young Oh, Hyung-Geun Moon, M. Zulfiqur Hossain, Theresa M. Salay, Karen E. Leeds, Hansen Du, Beibei Wu, Marian Waterman, Zhou Zhu & Jyoti Misra-Sen

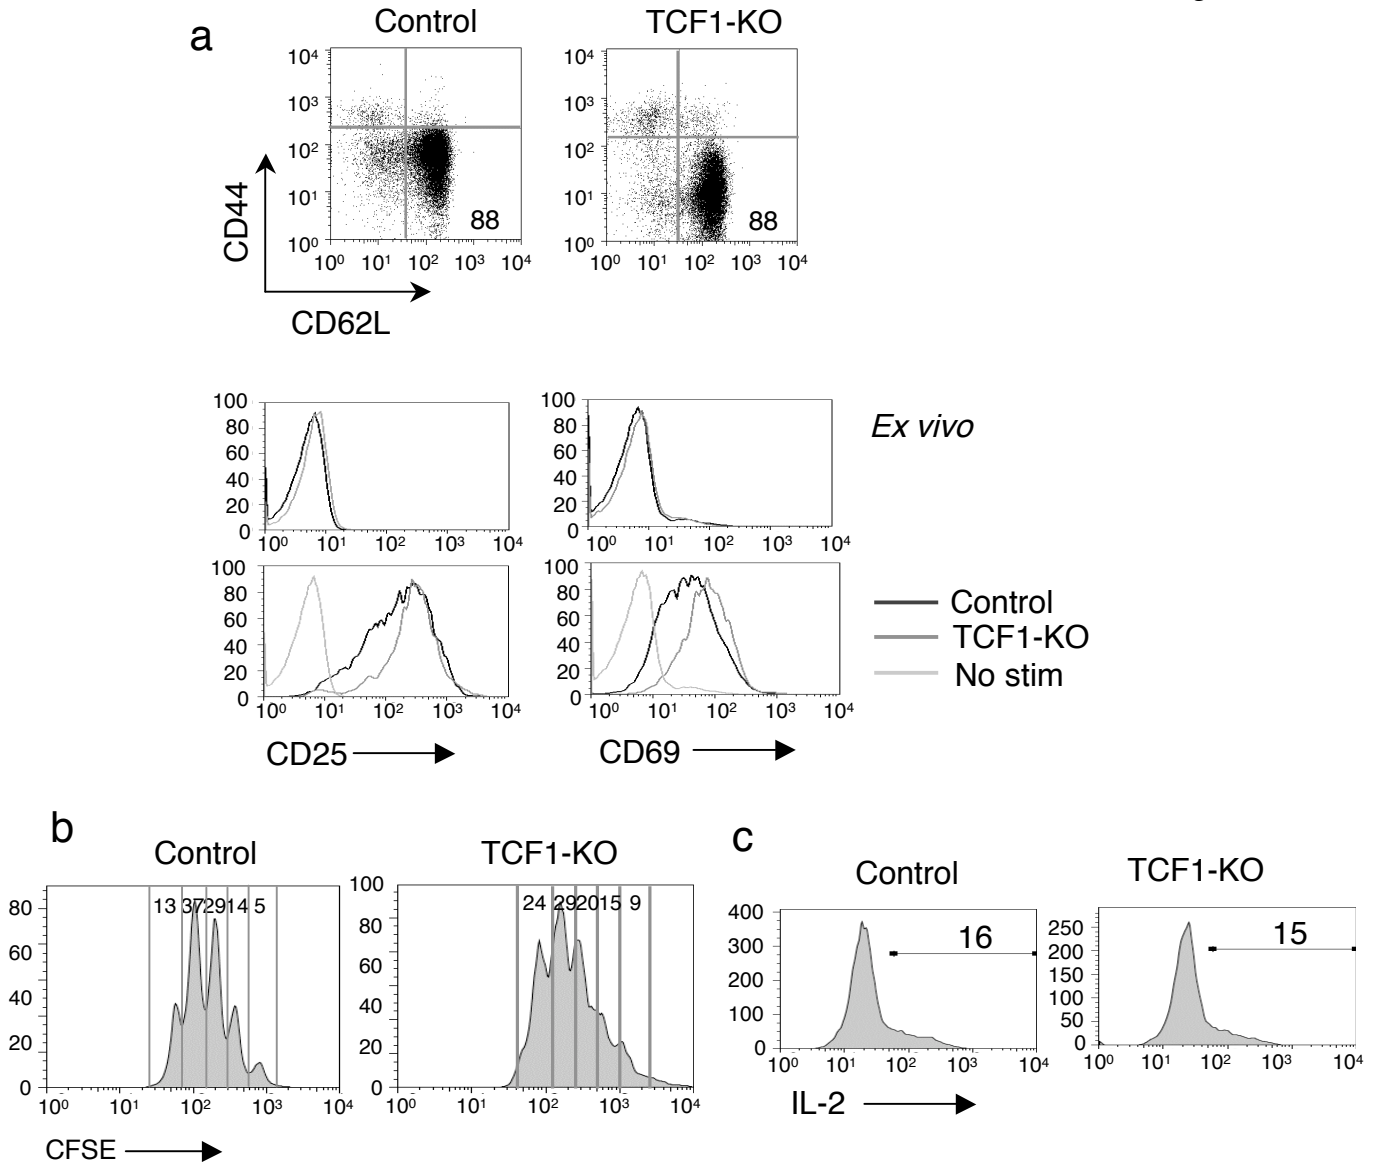

Supplementary Figure 1. Naïve-enriched TCF1-KO CD25<sup>-</sup> CD4<sup>+</sup> T cells are activated normally upon TCR-stimulation. (a) Early activation of TCF1-KO CD4<sup>+</sup> T cells upon TCR stimulation is normal. Purified CD25<sup>-</sup> CD4<sup>+</sup> T cells from control and TCF1-KO mice were stained with anti-CD44 and anti-CD62L and analyzed by flow cytometry (upper panels). CD25<sup>-</sup> CD4<sup>+</sup> T cells were activated with anti-CD3 and anti-CD28 and early activation was measured by induction of CD25 and CD69 (lower panels). Data are representative of 6 independent plots. (b) TCF1-KO CD4<sup>+</sup> T cells proliferate normally upon TCR stimulation. CFSE labeled CD25<sup>-</sup> CD4<sup>+</sup> T cells from control and TCF1-KO mice were stimulated with plate-bound anti-CD3 plus anti-CD28 antibodies for 3 days. CFSE intensity on gated CD4<sup>+</sup> T cells is shown and numbers show the percentage of cells in each cell division. Data are representative of 6 independent plots. (c) IL-2 production is unaffected in TCR-stimulated TCF1-KO CD4<sup>+</sup> T cells. CD25<sup>-</sup> CD4<sup>+</sup> T cells from control and TCF1-KO mice were stimulated with APC plus anti-CD3 for 2 days and IL-2 production was analyzed by intracellular staining. Data are representative of 6 independent plots.

**a** ICAT - Inhibitor of  $\beta$ -catenin and TCF (ICAT) binds  $\beta$ -catenin and prevents its interaction with TCF  
REFS: # 45 to 48 in the text.

Enforced expression from the proximal *Lck* promoter results in expression of ICAT in thymocytes and T cells in ICAT mice  
REF: # 49 in the text (Int. Imm. 20:925, 2008).

Stabilized  $\beta$ -catenin is a mutant form in which the GSK-3 $\beta$  phosphorylation sites have been deleted. This mutant form, expressed from the proximal *Lck* Promoter, is expressed in thymocytes and T cells in  $\beta$ -CAT-Tg mice.  
REF: #50 in the text (Int. Imm. 15:1485, 2003).

TCR-activation of CD4<sup>+</sup> T cells from  $\beta$ -CAT-Tg and ICAT mice is shown below.

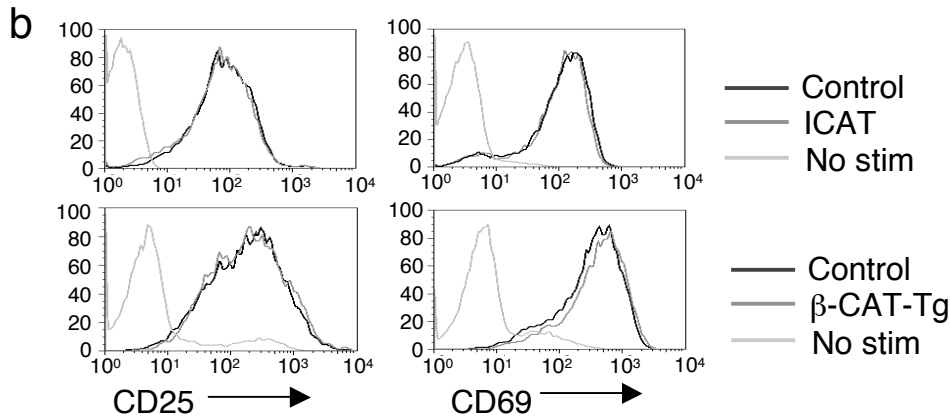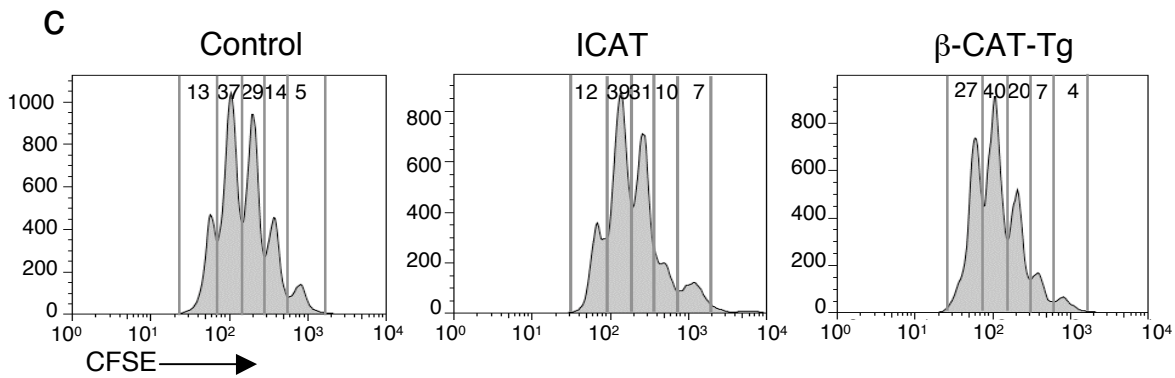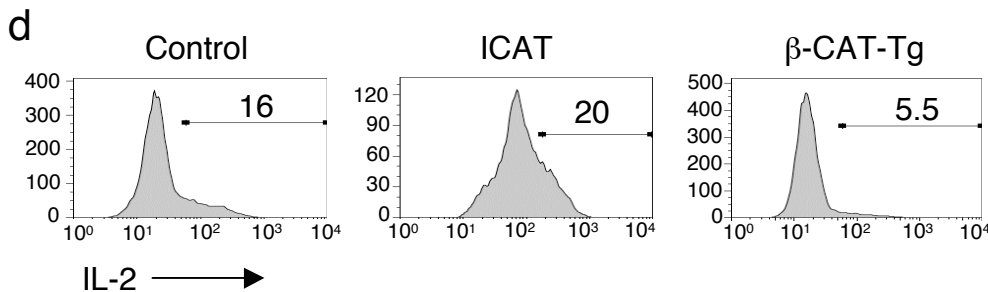

Supplementary Figure 2. Activation of ICAT and  $\beta$ -CAT-Tg CD4<sup>+</sup> T cells upon TCR-stimulation. (a) Description of ICAT and  $\beta$ -CAT-Tg mice. ICAT is a naturally occurring small protein that binds  $\beta$ -catenin and prevents its interaction with TCF1. ICAT gene and stabilized mutant of  $\beta$ -catenin gene were engineered upstream of the proximal *Lck* promoter to generate ICAT and  $\beta$ -CAT-Tg mice, respectively. (b) ICAT and  $\beta$ -CAT-Tg CD4<sup>+</sup> T cells are normally activated upon TCR-stimulation. CD25<sup>-</sup> CD4<sup>+</sup> T cells were purified from control, ICAT and  $\beta$ -CAT-Tg mice and stimulated with plate bound anti-CD3 plus anti-CD28 followed by surface staining with control antibody, anti-CD25 and anti-CD69. Data are representative of 6 independent plots. (c) ICAT and  $\beta$ -CAT-Tg CD4<sup>+</sup> T cells proliferate normally upon TCR-stimulation. CD25<sup>-</sup> CD4<sup>+</sup> T cells were purified from control, ICAT and  $\beta$ -CAT-Tg mice and stimulated as in (b) and proliferation was assessed by CFSE dilution as described in S1b. Data are representative of 6 independent plots. (d) IL-2 production by activated ICAT and  $\beta$ -CAT-Tg CD4<sup>+</sup> T cells. CD25<sup>-</sup> CD4<sup>+</sup> T cells were purified from control, ICAT and  $\beta$ -CAT-Tg mice and stimulated as in (b) and IL-2 production was assessed by intracellular staining. Data are representative of 4 independent plots.

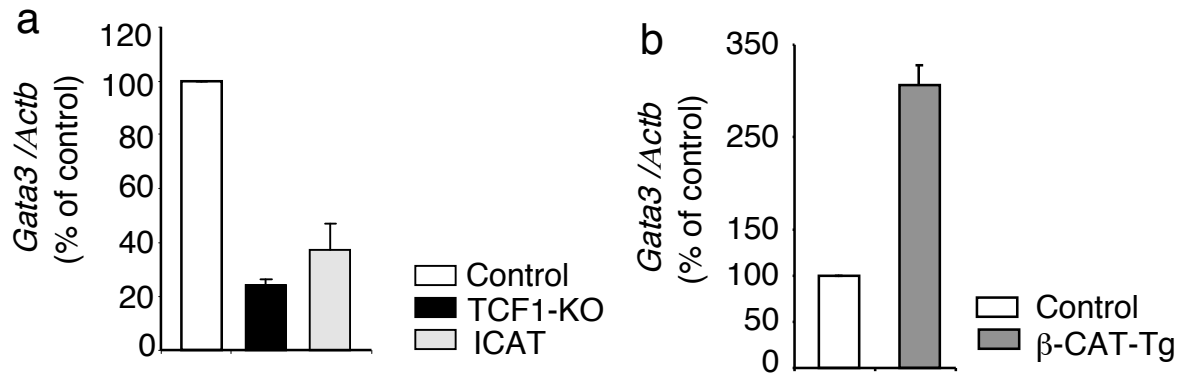

Supplementary Figure 3. TCF1 and  $\beta$ -catenin cooperatively regulate total *Gata3* expression. Purified CD25<sup>-</sup> CD4<sup>+</sup> T cells from control (n=6), TCF1-KO (n=2), ICAT (n=6)(a) or  $\beta$ -CAT-Tg mice (n=6) (b) were stimulated by APCs plus anti-CD3. On day 6 after stimulation the amount of total *Gata3* mRNA in stimulated cells was examined by real-time RT-PCR and is shown relative to control cells (control = 100%).

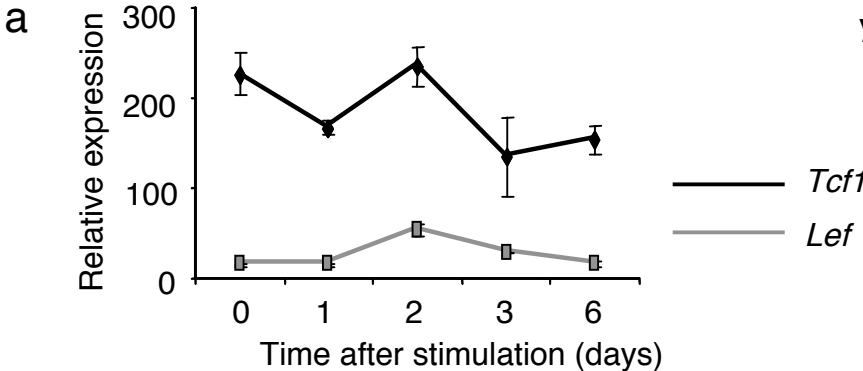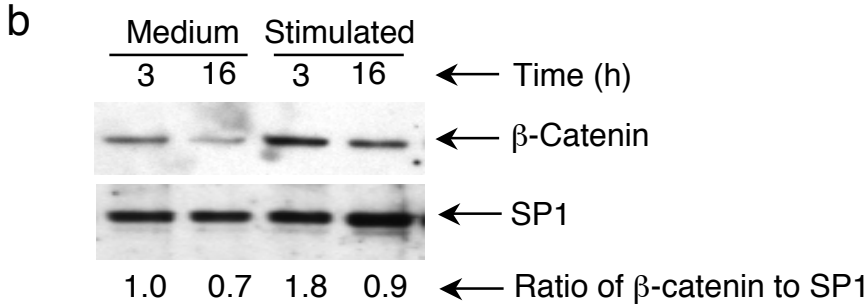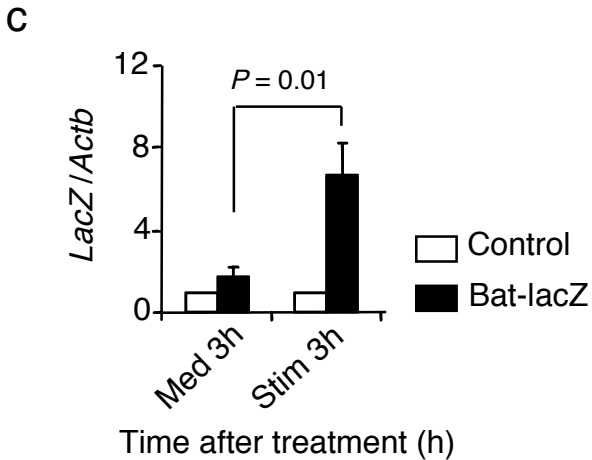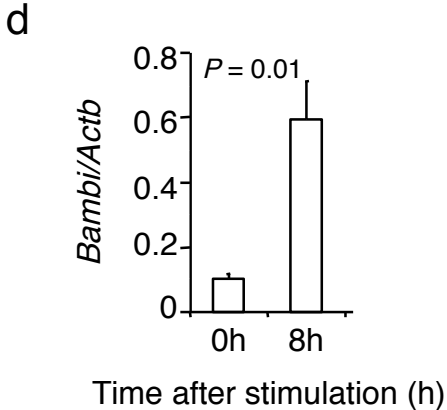

Supplementary Figure 4. TCF1 and  $\beta$ -catenin dependent transcription is active in stimulated CD4<sup>+</sup> T cells. (a) *Tcf1* is highly expressed in resting and activated CD4<sup>+</sup> T cells. CD25<sup>-</sup> CD4<sup>+</sup> T cells from C57BL/6 mice were stimulated with anti-CD3 plus anti-CD28 and the amount of mRNA for *Tcf1* and *Lef1* was measured at various time points by real-time RT-PCR. n = 5 independent samples. (b) TCR stimulation increases nuclear  $\beta$ -catenin level. Purified CD4<sup>+</sup> T cells from control mice were cultured in medium or stimulated by plate-bound anti-CD3 plus anti-CD28 antibodies for indicated amount of time. Nuclear extracts were made from the cells and analyzed by immunoblot for  $\beta$ -catenin protein. Lack of cytosolic contamination was confirmed by absence of PKC $\mu$  protein in the extracts. SP1 was used as a loading control. Ratio of  $\beta$ -catenin to SP1 protein in cells cultured in medium for 3 h is set as 1 and the relative ratio of  $\beta$ -catenin to SP1 proteins under other conditions are shown. Data are representative of 3 independent experiments. (c) TCR stimulation increases TCF1 and  $\beta$ -catenin dependent transcriptional activity. CD4<sup>+</sup> T cells from control mice or TCF1-reporter BAT-*LacZ* mice were activated with plate-bound anti-CD3 plus anti-CD28 for indicated amount of time and examined for *LacZ* expression by real-time RT-PCR ( n = 3 independent samples). (d) TCR stimulation induces TCF1 and  $\beta$ -catenin target gene expression. TCR-stimulated control CD4<sup>+</sup> T cells were assayed for the expression of *Bambi* mRNA (n = 3 independent samples).

|                        |   |   |   |   |   |   |   |
|------------------------|---|---|---|---|---|---|---|
| LEF protein            | - | + | - | + | + | + | + |
| TOP probe              | + | + | - | - | + | - | - |
| <i>Gata3</i> wt probe  | - | - | + | + | - | + | - |
| <i>Gata3</i> mut probe | - | - | - | - | - | - | + |

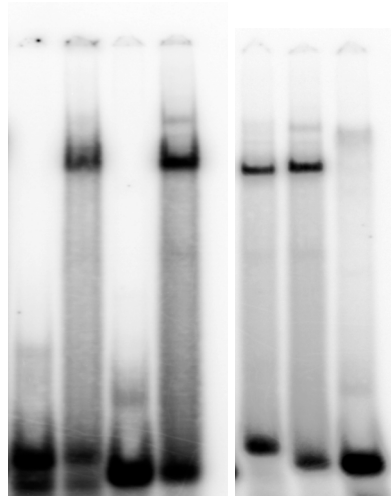

TOP probe: 5'-GATCTAGGGCACCCCTTTGAAGCTCT-3'  
*Gata3* wt probe: 5'-GCGGGCGTCCGAATCAAAGCCCAGGTCCTC-3'  
*Gata3* mut probe: 5'-GCGGGCGTCCGAATGAAATTCCAGGTCCTC-3'

Supplementary Figure 5. Purified LEF protein binds to the TCF1 binding sites upstream of *Gata3* exon-1b. EMSA was performed using purified LEF protein and <sup>32</sup>P labeled oligonucleotide probe corresponding to a portion of *Gata3* regulatory region upstream of exon-1b containing TCF1/LEF binding site (probe and mutant probe sequences shown below the gels). Oligonucleotide probe containing the TOP sequence was used as positive control. Data are representative of 2 independent experiments.



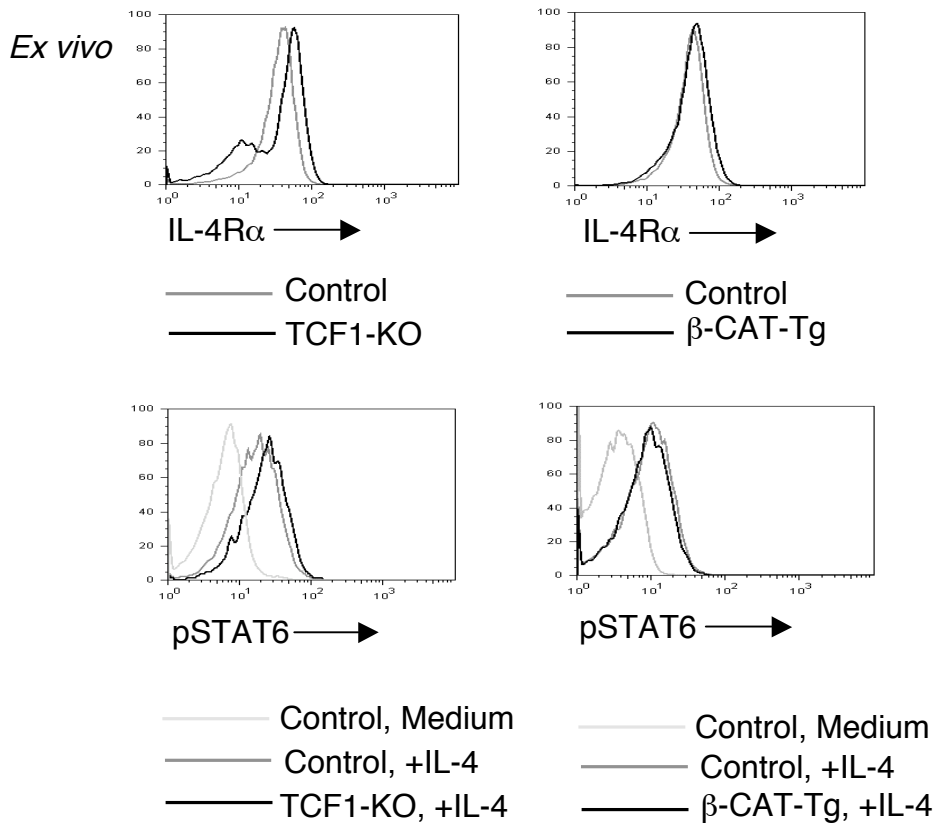

Supplementary Figure 6. IL-4 receptor expression and signaling is normal in CD4<sup>+</sup> T cells from TCF1-KO and β-CAT-Tg mice. Freshly isolated control, TCF1-KO or β-CAT-Tg CD25<sup>-</sup> CD4<sup>+</sup> T cells were stained for surface IL-4Rα (upper panels). Purified CD4<sup>+</sup> T cells were stimulated with IL-4 for 30 min and phospho-STAT6 (pSTAT-6) level was measured by intracellular staining. Data are representative of 3 independent plots.

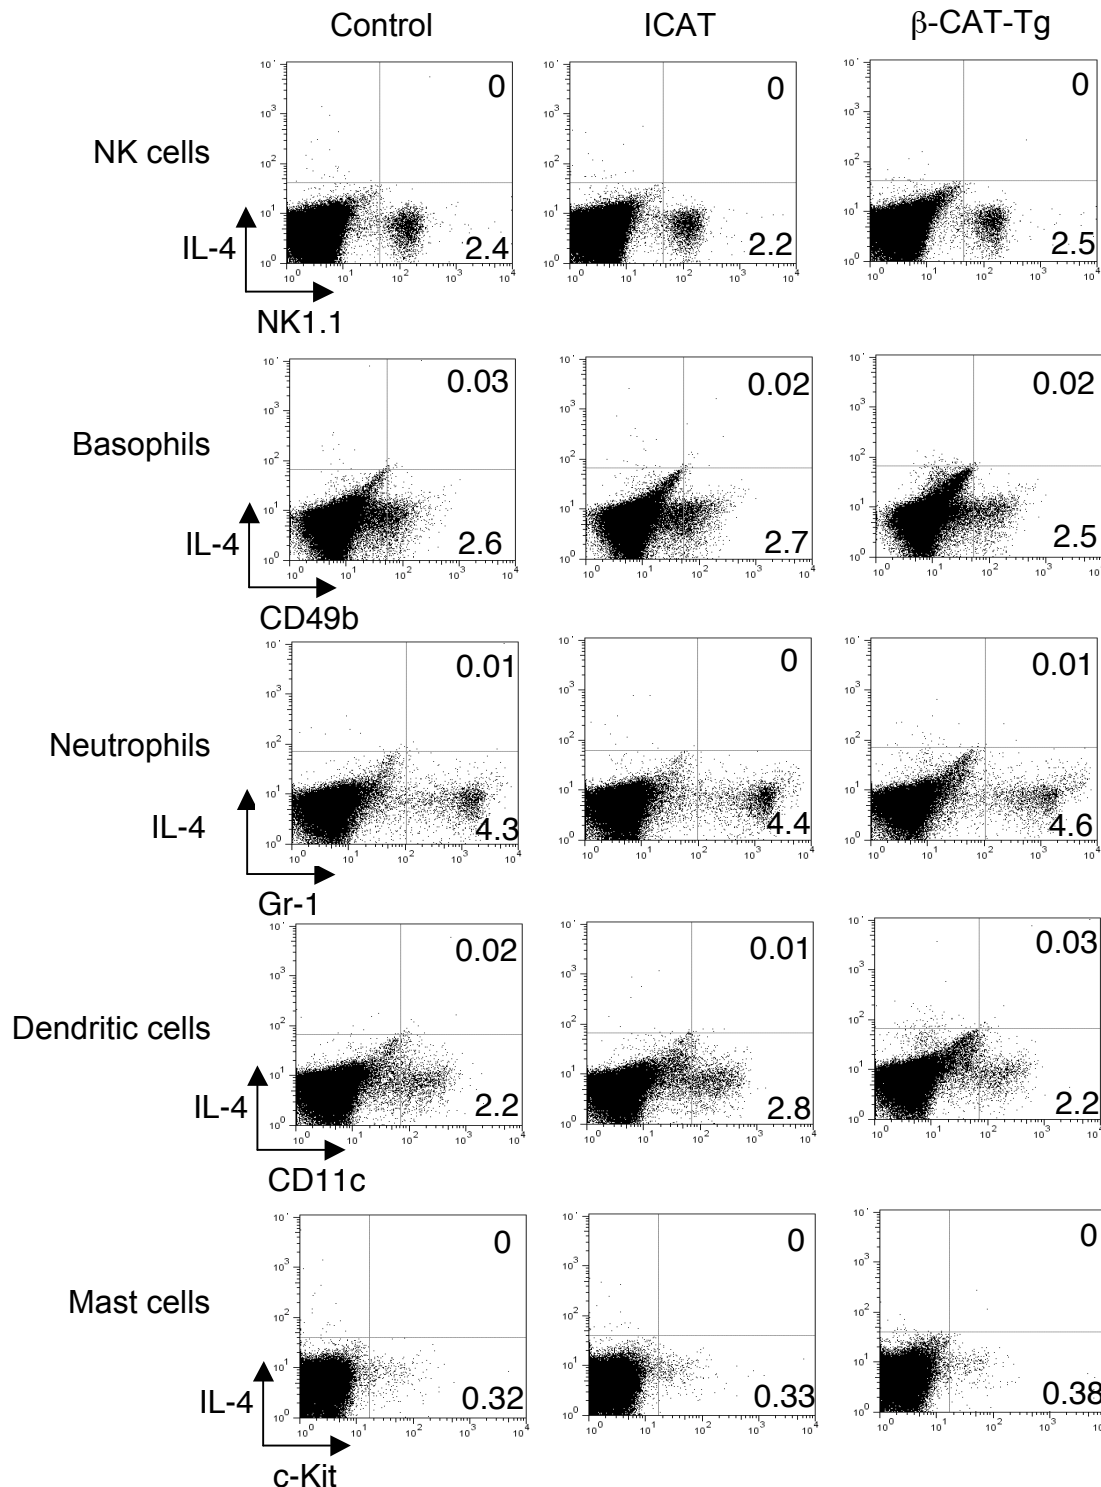

Supplementary Figure 7. SEB injection does not induce IL-4 production in non-T cells *in vivo*. SEB was injected and cells were removed and re-stimulated as described in Fig. 4e. *Ex vivo* cells were stained with antibodies to lineage markers followed by intracellular staining for IL-4. Dot plots are gated on TCR $\beta$ <sup>-</sup> cells. NK cells: NK1.1<sup>+</sup> TCR $\beta$ <sup>-</sup>; basophils: CD49b<sup>+</sup> TCR $\beta$ <sup>-</sup>; neutrophils: Gr-1<sup>+</sup> TCR $\beta$ <sup>-</sup>; dendritic cells: CD11c<sup>+</sup> TCR $\beta$ <sup>-</sup> and mast cells: c-kit<sup>+</sup> TCR $\beta$ <sup>-</sup>. Data are representative of 4 – 5 independent plots.

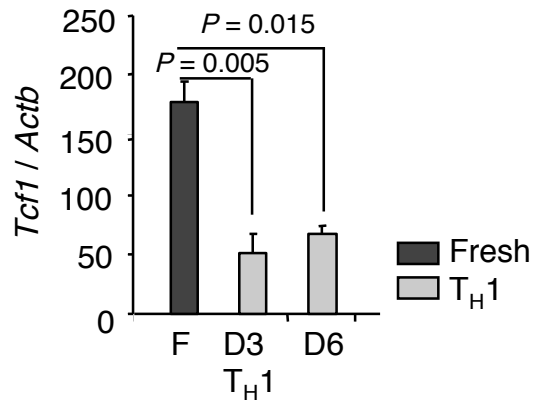

Supplementary Figure 8. *Tcf1* mRNA is down-regulated in differentiated T<sub>H</sub>1 cells. *Tcf1* mRNA level was analyzed by real-time RT-PCR in freshly isolated CD4<sup>+</sup> T cells and CD4<sup>+</sup> T cells cultured under T<sub>H</sub>1 skewing conditions for indicated amount of time ( n = 4 independent samples).

Supplementary Table 1. Primer sequences

| Gene name                     | Forward primer                    | Reverse primer                     |
|-------------------------------|-----------------------------------|------------------------------------|
| <i>Gata3</i>                  | 5'-AGAACCGGCCCTTATCAA -3'         | 5'-AGTTCGCGCAGGATGTCC-3'           |
| <i>Gata3-1a</i>               | 5'-CTGGCTGAGATGCAGTGAAG-3'        | 5'-CCGCCTTGCTGGAGATCTGA-3'         |
| <i>Gata3-1b</i>               | 5'-AGCTGTCTGCGAACACTGAG-3'        | 5'-TTTCTCCTCTCCCTCTCTCA-3'         |
| <i>Actb</i>                   | 5'-TGGATGACGATATCGCTGCG-3'        | 5'-AGGGTCAGGATACCTCTCTT-3'         |
| <i>Ii4</i>                    | 5'-TCATCGGCATTTTGAACGAGG-3'       | 5'-CTCACTCTCTGTGGTGTCTT-3'         |
| <i>Ii2</i>                    | 5'-TGGAGCAGCTGTTGATGGACC-3'       | 5'-TGGCCTGCTTGGGCAAGTAA-3'         |
| <i>Lef1</i>                   | 5'-GAGGACATCAAATAAAGTGCC<br>CG-3' | 5'-AAAGTGCTCGTCGCTGTAGG<br>TG-3'   |
| <i>Tcf1</i>                   | 5'-CATCAGCCAGAAGCAAGGAG-3'        | 5'-GGTCAGAGAATAAAATCCAGA<br>GAG-3' |
| <i>LacZ</i>                   | 5'-TCGGCGGTGAAATTATCGATG-3'       | 5'-ACCACCGCACGATAGAGAT<br>TC-3'    |
| <i>Bambi</i>                  | 5'-AAACCGGTATCAGCATGACA-3'        | 5'-TGCACTCCAAGTCCAAGTTT-3'         |
| <i>Ifn<math>\gamma</math></i> | 5'-GGATGCATTCATGAGTATTGC-3'       | 5'-CCTTTTCCGCTTCCTGAGG-3'          |
